# Supplementary material
Source: publisher figshare collection journal article supplement (https://tandf.figshare.com/articles/dataset/_/3085162)
Supplement: Supplementary file 21 [file 4]

Dalene STANGL

This author hopes that this discussion of  $p$ -values stirs the statistical education community to do a thorough self-evaluation of its course content and teaching. The normative misuse of  $p$ -values as a simplistic one-size-fits-all decision rule has always been problematic, and it is our community's responsibility to teach why using the  $p$ -value in this way is problematic. It is also our responsibility to teach more suitable alternatives (e.g.,

Bayesian decision-theoretic methods) despite the difficulty of doing so. To date, we in the statistics education community have been resistant to this consideration, instead focusing on finding conceptually easier ways of producing  $p$ -values (e.g., resampling and randomization methods), hence missing the bigger problem and perpetuating misuse.

---

Online discussion of the ASA Statement on Statistical Significance and P-Values, *The American Statistician*, 70. Dalene Stangl, Duke University, Box 90251, Durham, NC 27708-0251 (Email: dalene@stat.duke.edu).
